# Supplementary material for: Risk Factors for Delirium after Deep Brain Stimulation Surgery under Total Intravenous Anesthesia in Parkinson’s Disease Patients
Source: MDPI journal article supplement (doi:10.3390/brainsci13010025), 2022-12-22
Supplement: s1 [file s1]

Supplementary Table 1. Multivariate Logistic Regression Analysis Showing the Independent Predictors of POD after Controlling for Variables with *P* below 0.2

|                                   | OR    | 95% CI |        | <i>P</i> |
|-----------------------------------|-------|--------|--------|----------|
|                                   |       | Lower  | Upper  |          |
| Age                               | 1.165 | 0.994  | 1.366  | 0.059    |
| Gender                            | 0.22  | 0.031  | 1.572  | 0.131    |
| BMI                               | 1.198 | 0.909  | 1.579  | 0.2      |
| ASA                               | 0.769 | 0.118  | 4.99   | 0.783    |
| Length of hospital stay           | 1.125 | 0.729  | 1.737  | 0.594    |
| Diabetes                          | 2.609 | 0.113  | 60.307 | 0.549    |
| Operation duration                | 1.03  | 0.971  | 1.093  | 0.326    |
| Preoperative MMSE score           | 0.77  | 0.625  | 0.947  | 0.013    |
| Postoperative 24 h VAS pain score | 1.852 | 0.919  | 3.73   | 0.085    |
| Preoperative serum Na             | 0.915 | 0.53   | 1.581  | 0.75     |
| Preoperative serum Cl             | 0.842 | 0.51   | 1.388  | 0.499    |
| Preoperative serum glucose        | 1.432 | 0.609  | 3.368  | 0.411    |
| UPDRS Part 1 score                | 0.729 | 0.51   | 1.042  | 0.083    |
| UPDRS Part 2 score                | 1.196 | 0.992  | 1.442  | 0.061    |
| UPDRS Part 3 (on state) score     | 1.086 | 1.001  | 1.178  | 0.048    |
| UPDRS Part 3 (off state) score    | 0.979 | 0.893  | 1.073  | 0.653    |
| NMSS score                        | 1.401 | 0.962  | 2.041  | 0.079    |
| SSA score                         | 1.017 | 0.475  | 2.176  | 0.965    |
| HAMD score                        | 1.185 | 0.967  | 1.451  | 0.102    |
| Brian hemorrhage                  | 0.901 | 0.114  | 7.245  | 0.929    |
| Brian edema                       | 6.746 | 0.824  | 55.207 | 0.075    |

BMI, body mass index; ASA, American Society of Anesthesiologists; MMSE, Mini-Mental State Examination; VAS, visual analog scale; UPDRS, unified Parkinson's disease rating scale; NMSS, non-motor symptom scale; SSA, standardized swallowing assessment; HAMD, hamilton depression scale; POD, postoperative delirium; OR, odds ratio; CI, confidence interval.
